# Supplementary material for: A precursor state for formation of TiAl3 complex in reversible hydrogen desorption/adsorption from Ti-doped NaAlH4
Source: Royal Society of Chemistry journal article supplement (doi:10.1039/b600679e), 2006-01-01
Supplement: b600679e.pdf [file b600679e.pdf]

**Supplementary information:** GGA-relaxed structures and binding energies of Ti in Ti-doped NaAlH<sub>4</sub>(001) with Ti occupying various possible positions. (a) Ti adsorbed on the surface and connected with two neighboring AlH<sub>4</sub><sup>-</sup> hydrides. (b) Ti substitutes lattice Na<sup>+</sup> and pushes Na upward or downward. (c) Ti occupies interstitial site and binds three neighboring AlH<sub>4</sub><sup>-</sup> hydrides. Binding energies (in eV) are labeled in the corresponding structure.

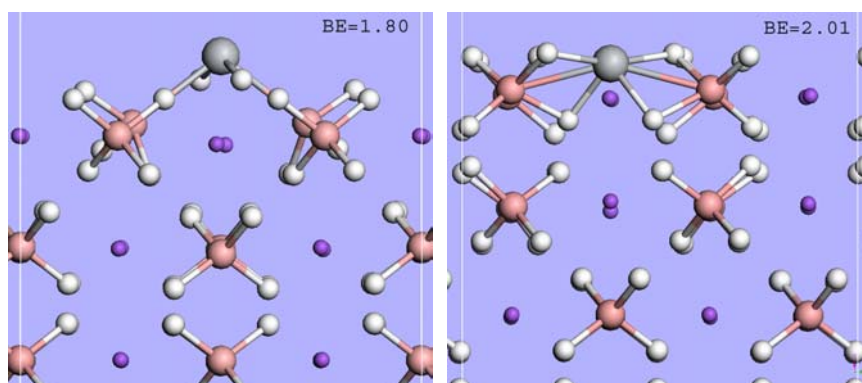

(a)

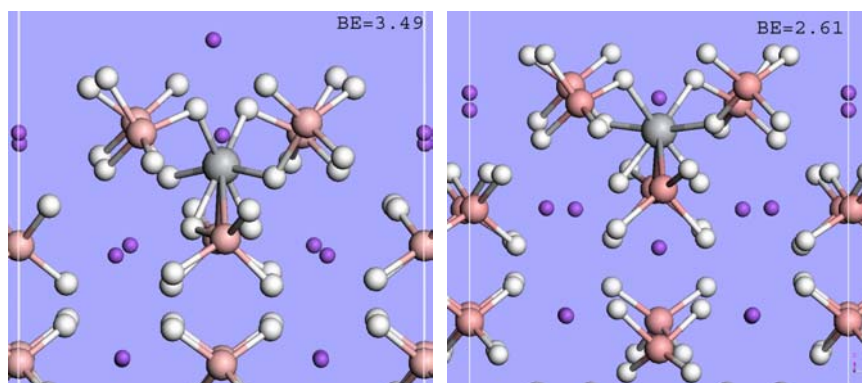

(b)

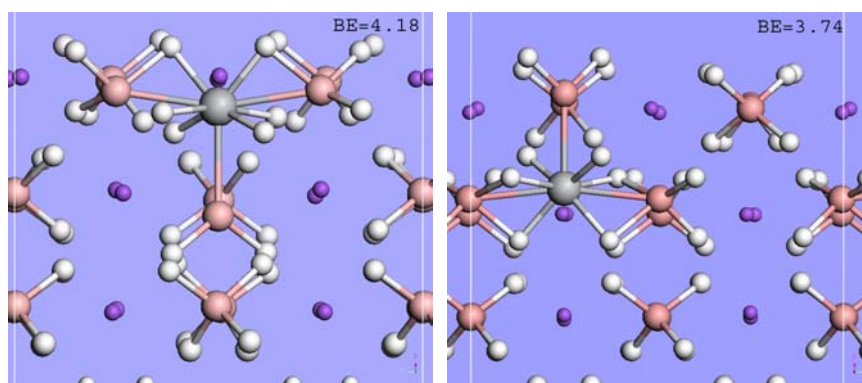

(c)
